# Supplementary material for: Hyperphosphorylated tau mediates neuronal death by inducing necroptosis and inflammation in Alzheimer’s disease
Source: Springer Nature journal article supplement (doi:10.1186/s12974-022-02567-y), 2022-08-15

**Figure 1**

**D**

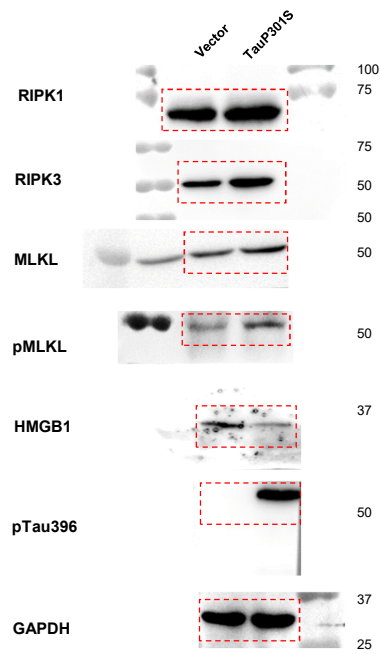

**E**

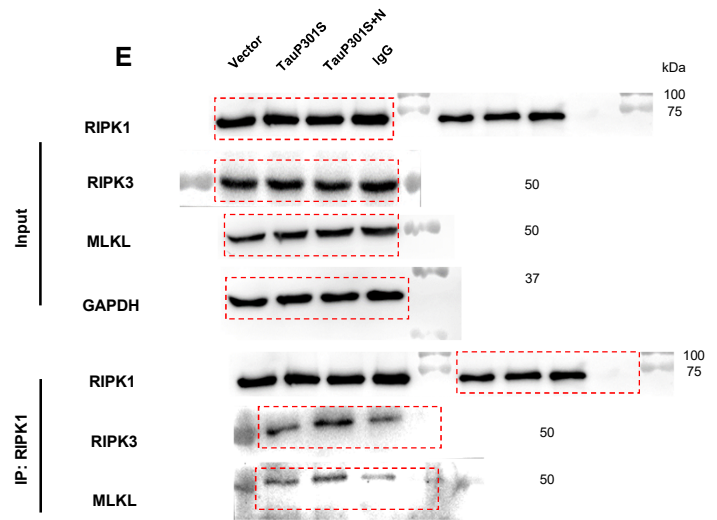

**F**

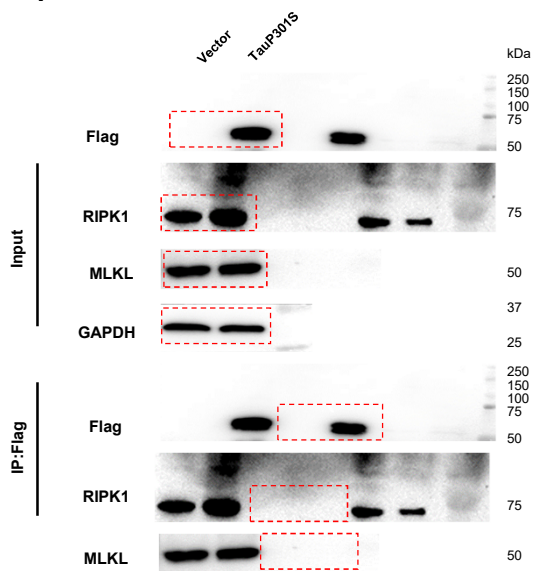

**Figure 2**

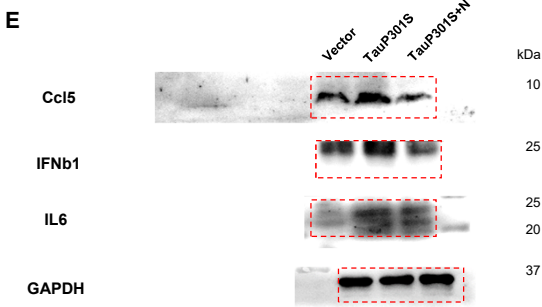

**Figure 3**

**A**

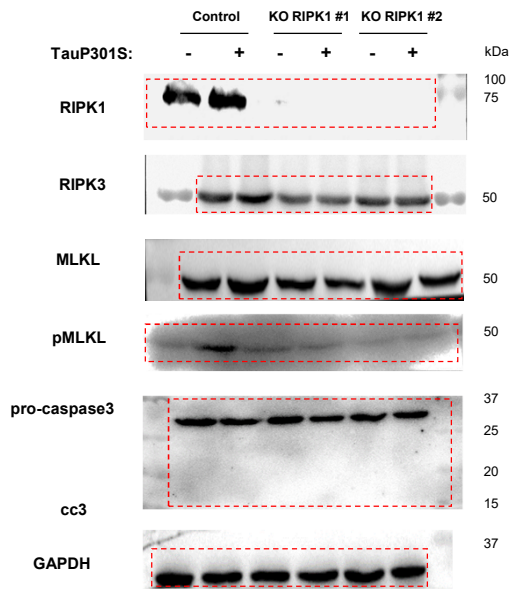

**B**

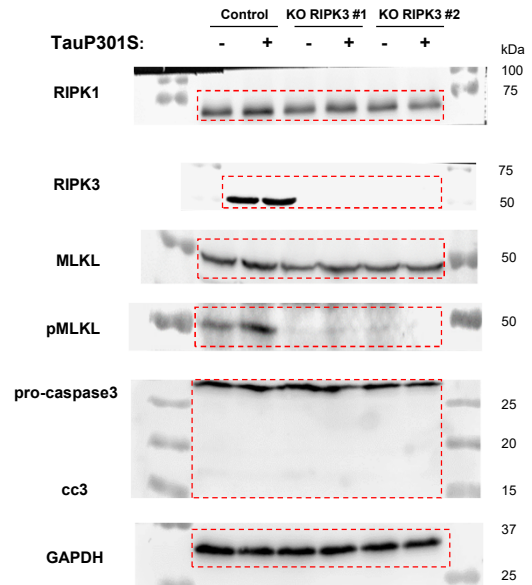

**C**

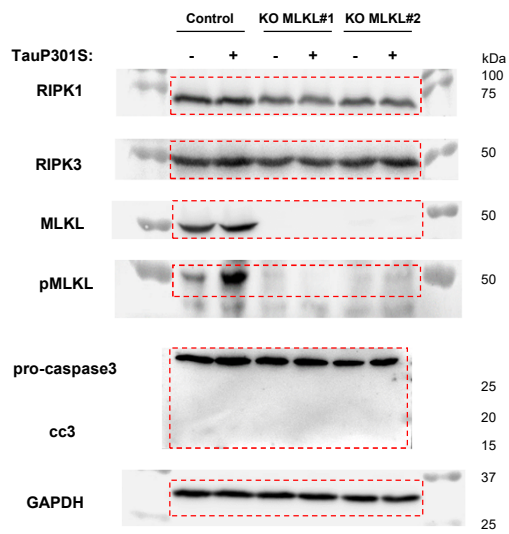

**Figure 4**

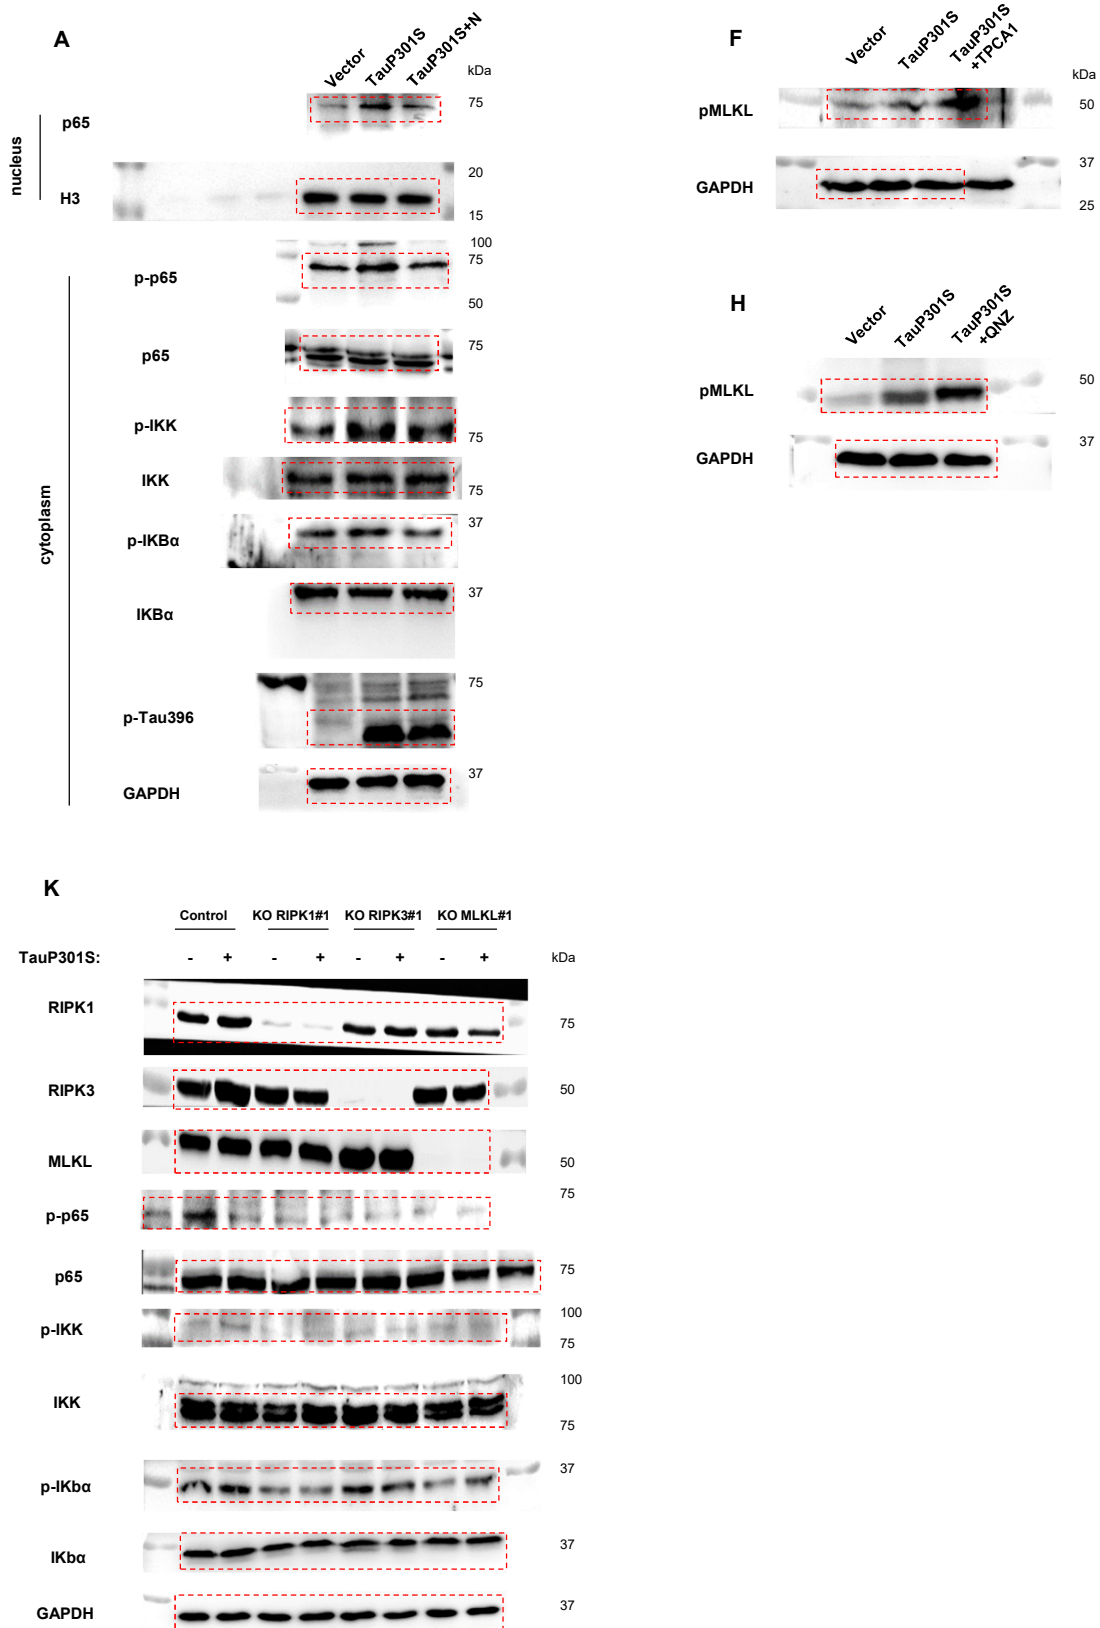

**Figure 5**

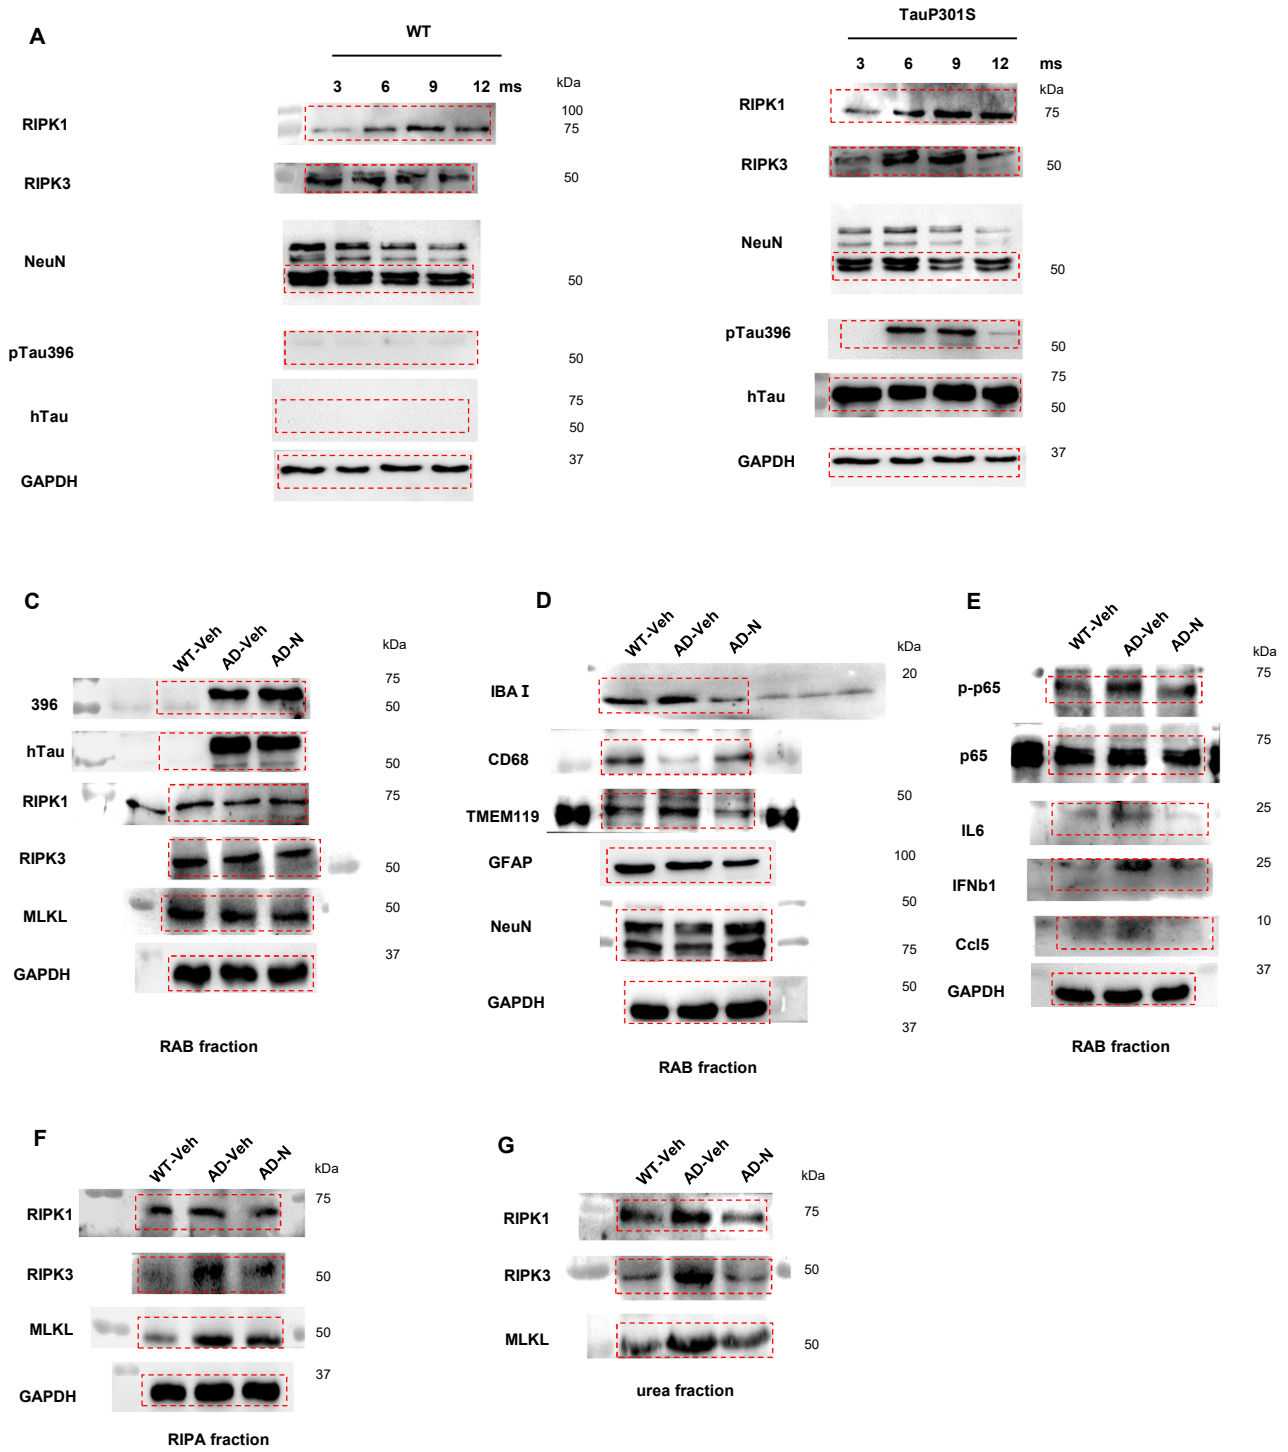

**Figure S1**

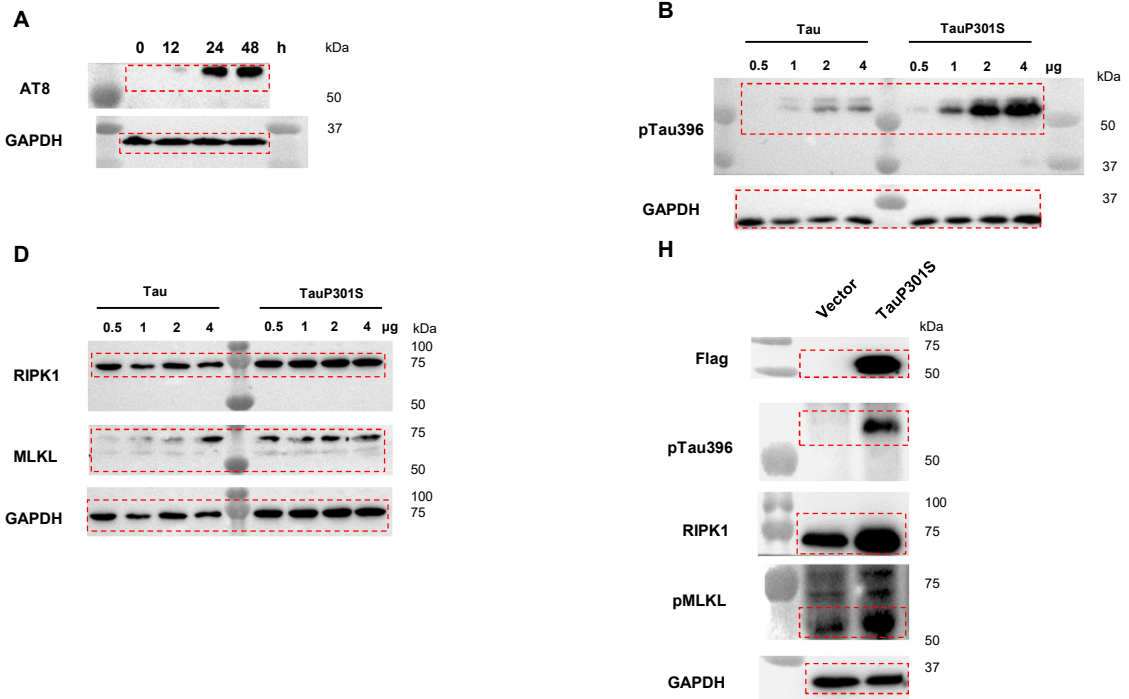

Supplement: MOESM9 [file 23367794]
